# Supplementary material
Source: PubMed Central journal article supplement (PMC5070957)
Supplement: jciinsight-1-90045-s001.pdf [file jciinsight-1-90045-s001.pdf]

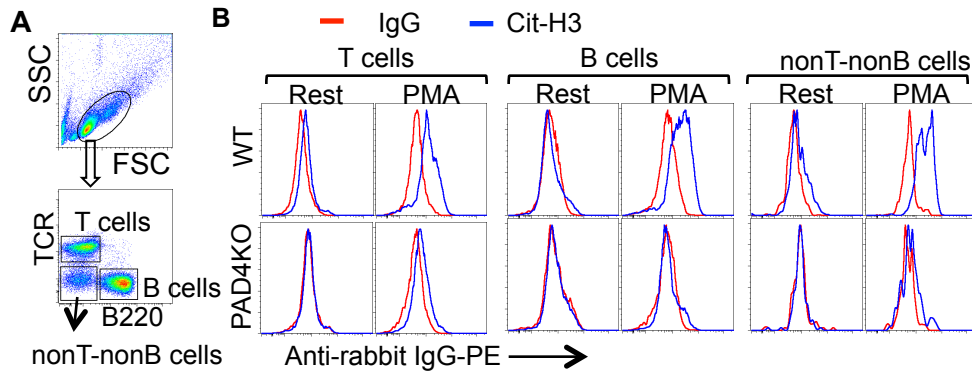

**Supplemental Figure 1. Intracellular staining of citrullinated histone H3 (cit-H3).** Wild type and PAD4-deficient (PAD4KO) splenocytes were left unstimulated or stimulated with PMA for 2 hours, then stained for TCR $\alpha$  and B220, fixed, and permeabilized. The cells were then blocked with BSA, stained with anti-cit-H3 or control IgG and then with PE-conjugated anti-rabbit IgG. The stained cells were analyzed with FACS. The gating of live cells, T cells, B cells, and nonT-nonB cells is shown in **A**. The histograms of PE channel of anti-cit-H3 were overlaid with those of control IgG. The overlay of each indicated population of WT and PAD4KO cells is shown in **B**.

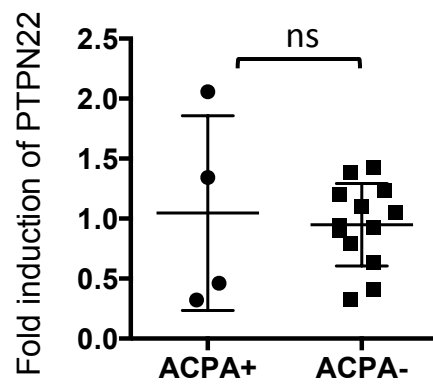

**Supplemental Figure 2. Induction of PTPN22 in PBMC of at-risk individuals (ARIs).** The fold induction of PTPN22 from anti-citrullinated protein antibody (ACPA)+ and ACPA- ARIs shown in Figure 3F was compared with Student's t test.

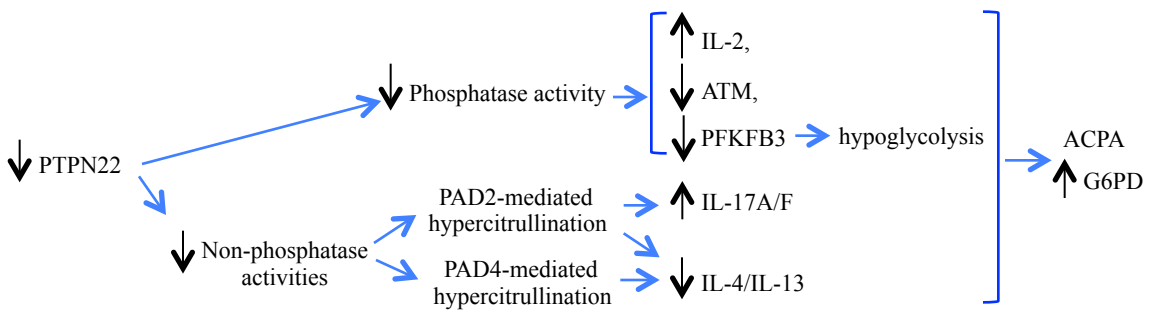

**Supplemental Figure 3:** A proposed molecular signature of preclinical rheumatoid arthritis triggered by impaired induction of PTPN22, which is responsible for maintaining a normal phenotype of PBMC through its phosphatase and non-phosphatase activities.

Table S1: Sequences of real time PCR primers (except those used in Figure 6C)

| <b>Gene</b> | <b>Forward primers</b> | <b>Reverse primer</b>  |
|-------------|------------------------|------------------------|
| PTPN22      | GCAGAAGTTCCTGGATGAG    | TCAGCCACAGTTGTAGGATAG  |
| IL-17F      | GCGTTTCCATGTCACGTAACA  | CAGCCCAAGTTCCTACACTGG  |
| G6PD        | GGCCGTACCAAGAACATTC    | TGGTCGATGCGGTAGATCTG   |
| ATM         | GGCATTCTCTCATTAGCCCG   | TTCATCCAACCTCCAGCTCTCG |
| PFKFB3      | CTCGCATCAACAGCTTTGAGG  | TCAGTGTTTCCTGGAGGAGTC  |
| b-Actin     | GTGACAGCAGTCGGTTGGAG   | AGGACTGGGCCATTCTCCTT   |

Table S2: PCR primers used in Figure 6C

| <b>Gene</b> | <b>Forward primer</b>   | <b>Reverse primer</b>    |
|-------------|-------------------------|--------------------------|
| PAD2        | ACCTCTGGACCGATGTCTACA   | TCCCTTCCTCGTCATAGTAGTTG  |
| IL-4        | CCAACTGCTTCCCCCTCTG     | TCTGTTACGGTCAACTCGGTG    |
| IL-13       | GCAATGGCAGCATGGTATGG    | AAGGAATTTTACCCCTCCCTAACC |
| IL-17       | AGATTACTACAACCGATCCACCT | GGGGACAGAGTTCATGTGGTA    |
| IL-17F      | GCTGTCGATATTGGGGCTTG    | GGAAACGCGCTGGTTTTTCAT    |
| Actin       | AGCGGGAAATCGTGCGTG      | CAGGGTACATGGTGGTGC       |
